# Supplementary material for: Structure and kinetics of chemically cross-linked protein gels from small-angle X-ray scattering
Source: Royal Society of Chemistry journal article supplement (doi:10.1039/c3cp54219j), 2013-12-23
Supplement: c3cp54219j.pdf [file c3cp54219j.pdf]

**Electronic Supplementary Information**  
**for**  
**Structure and Kinetics of Chemically Cross-Linked**  
**Protein Gels from Small-Angle X-ray Scattering**

Shuji Kaieda<sup>a</sup>, Tomás S. Plivelic<sup>b</sup> and Bertil Halle<sup>a</sup>

<sup>a</sup>*Department of Biophysical Chemistry, Lund University, PO Box 124, SE-22100 Lund, Sweden*

<sup>b</sup>*MAX IV Laboratory, Lund University, PO Box 118, SE-22100 Lund, Sweden*

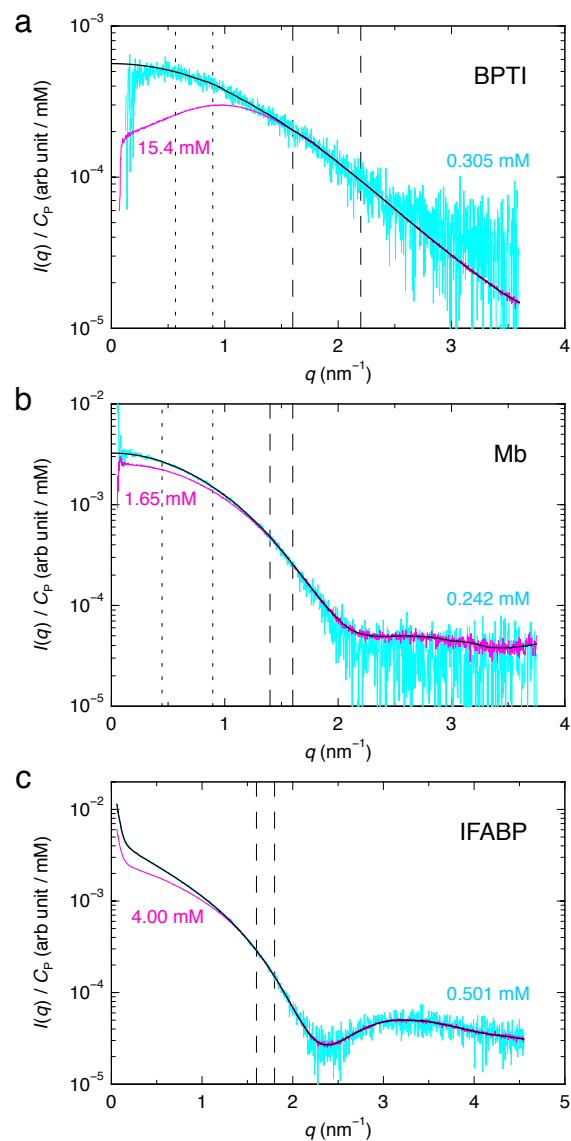

**Fig. S1** Apparent form factor (black) and solution SAXS profiles (magenta and cyan) for BPTI (a), Mb (b) and IFABP (c). Dashed and dotted vertical lines indicate the  $q$  windows where the two solution scattering files were superimposed and where the Guinier analysis was performed, respectively (Sec. 2.3).

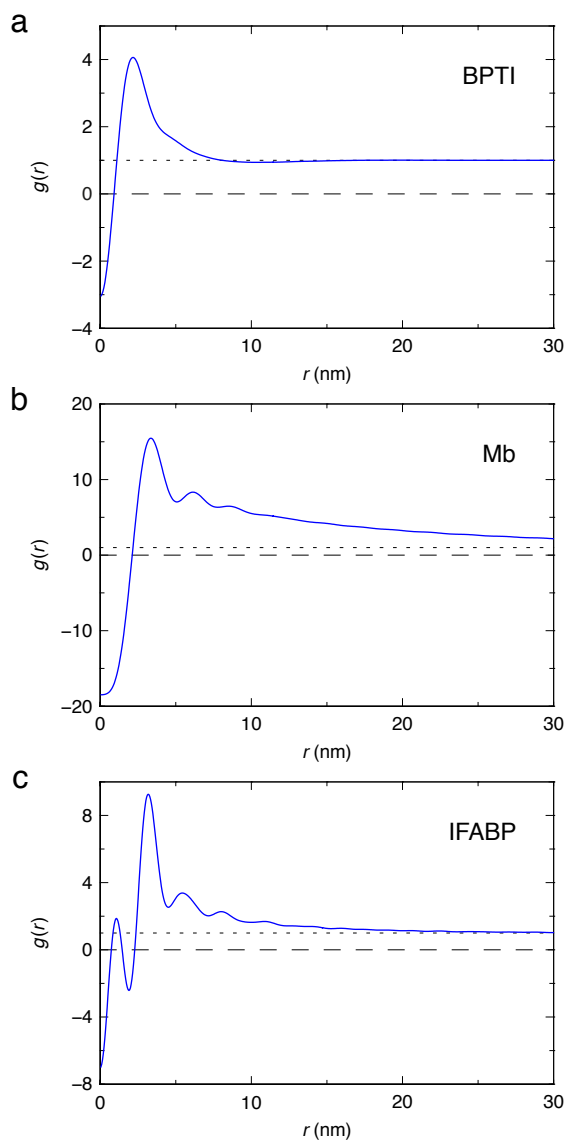

**Fig. S2** Pair correlation function,  $g(r)$ , for cross-linked BPTI (a), Mb (b), and IFABP (c), obtained by fast sine transform of the modified structure factor,  $S(q)$  (blue curve in Fig. 3). The dotted line indicates the asymptote  $g(r \rightarrow \infty) = 1$ . The negative  $g(r)$  at small  $r$  is an artifact caused by setting  $S(q) = 1$  at high  $q$ .

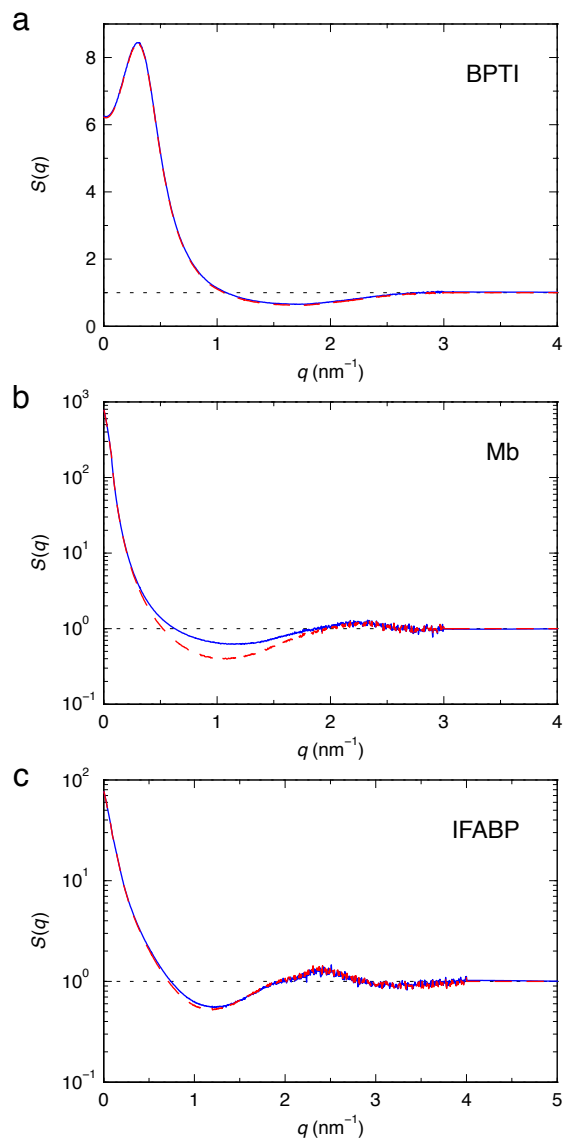

**Fig. S3** Back-calculated structure factor,  $S(q)$ , for cross-linked BPTI (a), Mb (b) and IFABP (c). The red dashed curve is the inverse sine transform of the modified (non-negative)  $g(r)$ . The blue curve is the original  $S(q)$  (blue curves in Fig. 3).

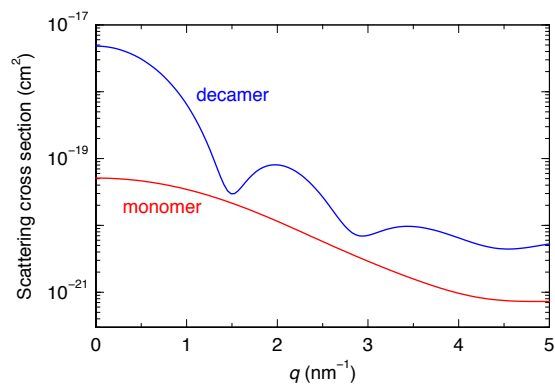

**Fig. S4** Scattering cross section for BPTI monomer (red) and decamer (blue). The curves were calculated from the atomic coordinates of the crystal structures 1bpi<sup>1</sup> (monomer) and 1bhc<sup>2</sup> (decamer) using the program CRY SOL<sup>3</sup> without hydration-layer correction.

**Table S1** Timing of kinetics series.<sup>a</sup>

| #  | t (min)           |                 |                    |
|----|-------------------|-----------------|--------------------|
|    | BPTI <sup>b</sup> | Mb <sup>c</sup> | IFABP <sup>c</sup> |
| 1  | 1.5               | 1.2             | 1.2                |
| 2  | 6.8               | 2.2             | 2.8                |
| 3  | 11.8              | 3.1             | 4.3                |
| 4  | 16.9              | 4.1             | 5.9                |
| 5  | 27.0              | 5.1             | 7.4                |
| 6  | 37.2              | 6.0             | 8.9                |
| 7  | 47.3              | 7.0             | 10.5               |
| 8  | 62.6              | 7.9             | 12.0               |
| 9  | 113.2             | 8.9             | 13.6               |
| 10 | 178.9             | 9.8             | 15.1               |
| 11 | 239.7             | 10.8            | 16.6               |
| 12 | 300.3             | 11.7            | 18.2               |
| 13 | 361.1             | 12.7            | 19.7               |
| 14 | 421.7             | 13.6            | 22.0               |
| 15 | 482.5             | 14.6            | 23.6               |
| 16 | 507.9             | 15.6            | 25.1               |

<sup>a</sup> Time elapsed from GA addition to the middle of the irradiation period, including a 1 min dead time.

<sup>b</sup> 60 s irradiation period.

<sup>c</sup> 10 s irradiation period.

## References

- 1 S. Parkin, B. Rupp and H. Hope, *Acta Crystallogr.*, 1996, **D52**, 18–29.
- 2 C. Hamiaux, T. Prangé, M. Riès-Kautt, A. Ducruix, S. Lafont, J. P. Astier and S. Veessler, *Acta Crystallogr.*, 1999, **D55**, 103–113.
- 3 D. Svergun, C. Barberato and M. H. J. Koch, *J. Appl. Crystallogr.*, 1995, **28**, 768–773.
